# Supplementary material
Source: MDPI journal article supplement (https://www.mdpi.com/2073-4344/13/9/1298)
Supplement: s1 [file s1]

## Supporting information

# Hydrolysis–Dehydration of Cellulose: Efficiency of NbZr Catalysts under Batch and Flow Conditions

Nikolay V. Gromov<sup>1\*</sup>, Olga L. Ogorodnikova<sup>1</sup>, Tatiana B. Medvedeva<sup>1</sup>,  
Valentina N. Panchenko<sup>1</sup>, Irina S. Yakovleva<sup>1</sup>, Lyubov A. Isupova<sup>1</sup>, Maria N. Timofeeva<sup>1</sup>,  
Oxana P. Taran<sup>1</sup>, Cyril Aymonier<sup>2</sup>, Valentin N. Parmon<sup>1</sup>

<sup>1</sup> *Boriskov Institute of Catalysis SB RAS, 630090, Lavrentiev av. 5, Novosibirsk, Russia*

<sup>2</sup> *CNRS, Univ. Bordeaux, Bordeaux INP, ICMCB UMR5026, 33600 Pessac, France.*

### **\*Corresponding authors**

Nikolay V. Gromov, PhD, associate professor

Tel.: +7-383-32-69-591

Fax: +7-383-33-08-056

E-mail: gromov@catalysis.ru

Address: Boriskov Institute of Catalysis SB RAS, Lavrentiev av., 5, 630090, Novosibirsk,  
Russian Federation

## Content

|                                                                                             | Page |
|---------------------------------------------------------------------------------------------|------|
| S1 List of chemicals used as HPLC standard                                                  | 3    |
| S2. Characterization of Nb, Zr-catalysts                                                    | 3    |
| S2.1 Investigation of Nb, Zr-catalysts DR-UV-vis spectroscopy                               | 4    |
| S2.2 Investigation of Nb, Zr-catalysts by DRIFT spectroscopy                                | 4    |
| S2.3 Investigation of acidic sites nature                                                   | 4    |
| S3 Catalytic properties                                                                     | 6    |
| S4 The scheme of the apparatus of hydrolysis-dehydration of cellulose under flow conditions | 7    |

## S1. List of chemicals used as HPLC standards

D-glucose  $C_6H_{12}O_6$  (99%, Fisher Chemical), D-fructose  $C_6H_{12}O_6$  (>99%, Sigma-Aldrich), D-mannose  $C_6H_{12}O_6$  (>99%, Sigma-Aldrich), 5-Hydroxymethylfurfural  $C_6H_6O_3$  (>98%, Acros Organics), maltose  $C_{12}H_{22}O_{11}$  (> 90%, Acros Organics), levulinic acid  $C_5H_8O_3$  (98%, Acros Organics), formic acid  $CH_2O_2$  (Panreac), acetic acid  $C_2H_4O_2$  (ReaChem), succinic acid  $C_4H_6O_4$  (99%, Sigma-Aldrich), glycolic acid  $C_2H_4O_3$  (99%, Sigma-Aldrich), glyceraldehyde (95%, Sigma-Aldrich), glycolaldehyde dimer (95%, Sigma-Aldrich) were used as HPLC standards.

## S2. Characterization of Nb, Zr-catalysts

### S2.1 Investigation of Nb, Zr-catalysts DR-UV-vis spectroscopy

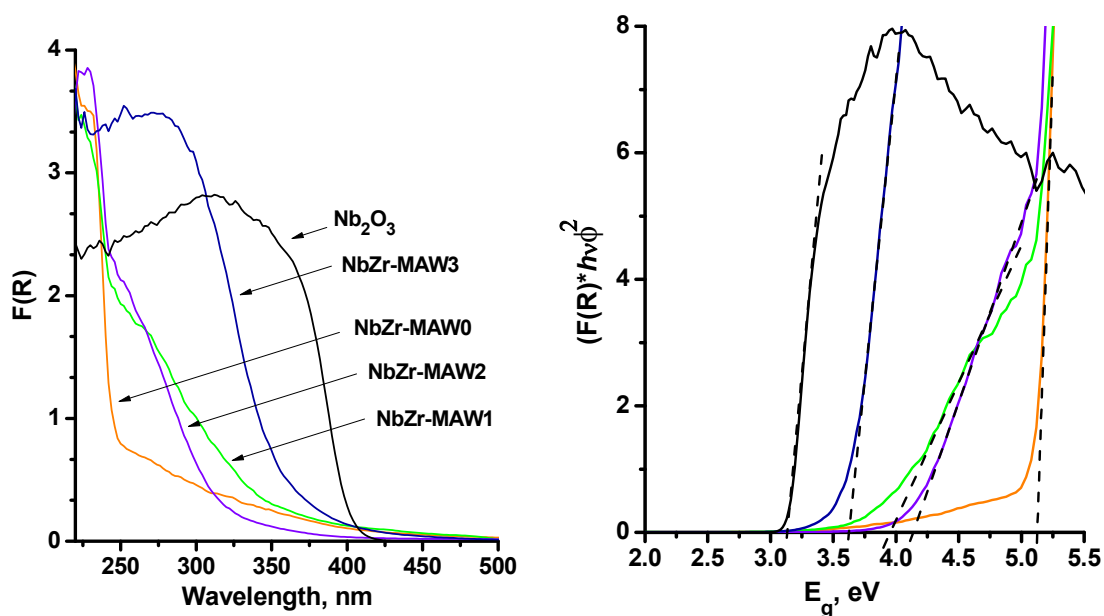

**Figure S1.** DR-UV-Vis spectra of NbZr-MAW samples and correlation between  $E_g$  and:  $[F(R) * hv]^2$

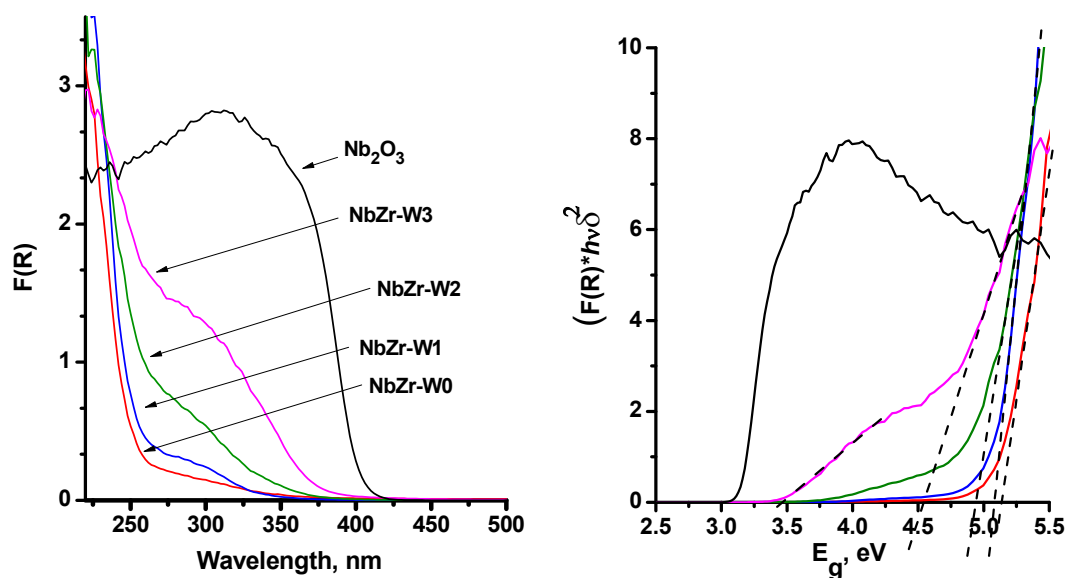

**Figure S2.** DR-UV-Vis spectra of NbZr-W samples and correlation between function  $[F(R_{\infty}) hv]^2$  and  $E_g$ .

### S2.2 Investigation of Nb,Zr-catalysts by DRIFT spectroscopy

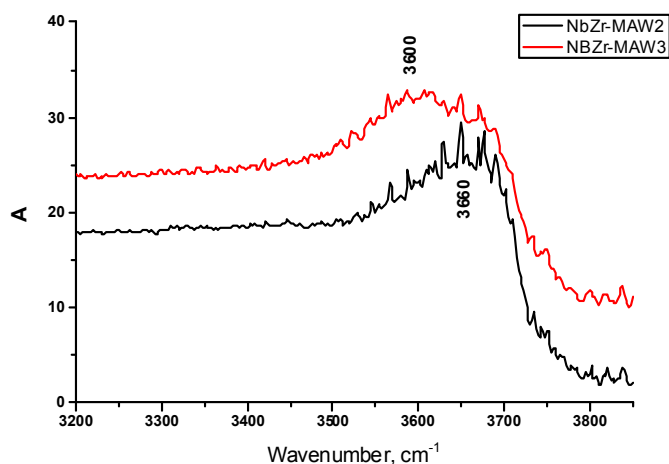

**Figure S3.** IR spectra of-MAW2 and NbZr-MAW3 samples calcination at 673 K.

### S2.3 Investigation of acidic sites nature

Pyridine adsorption was used to determine the Brønsted (BAS) and Lewis (LAS) surface acid sites. After recording the IR spectrum of the dehydroxylated support, the sample was treated with pyridine vapor at room temperature. Then it was heated at 423 K for 15 minutes. Pyridine was downloaded for 30 minutes at 423 K to a residual vacuum of  $2 \times 10^{-2}$  Torr. Then the sample was cooled to room temperature and the IR spectrum was recorded. The concentration of BAS and LAS were estimated from the integrated intensity of the absorption band of the pyridinium ion with a maximum in the region of  $1535 - 1550 \text{ cm}^{-1}$  ( $A_0 - 3 \text{ cm } \mu\text{mol}^{-1}$ ) and  $1445 \text{ cm}^{-1}$  ( $A_0 - 3.5 \text{ cm } \mu\text{mol}^{-1}$ ).

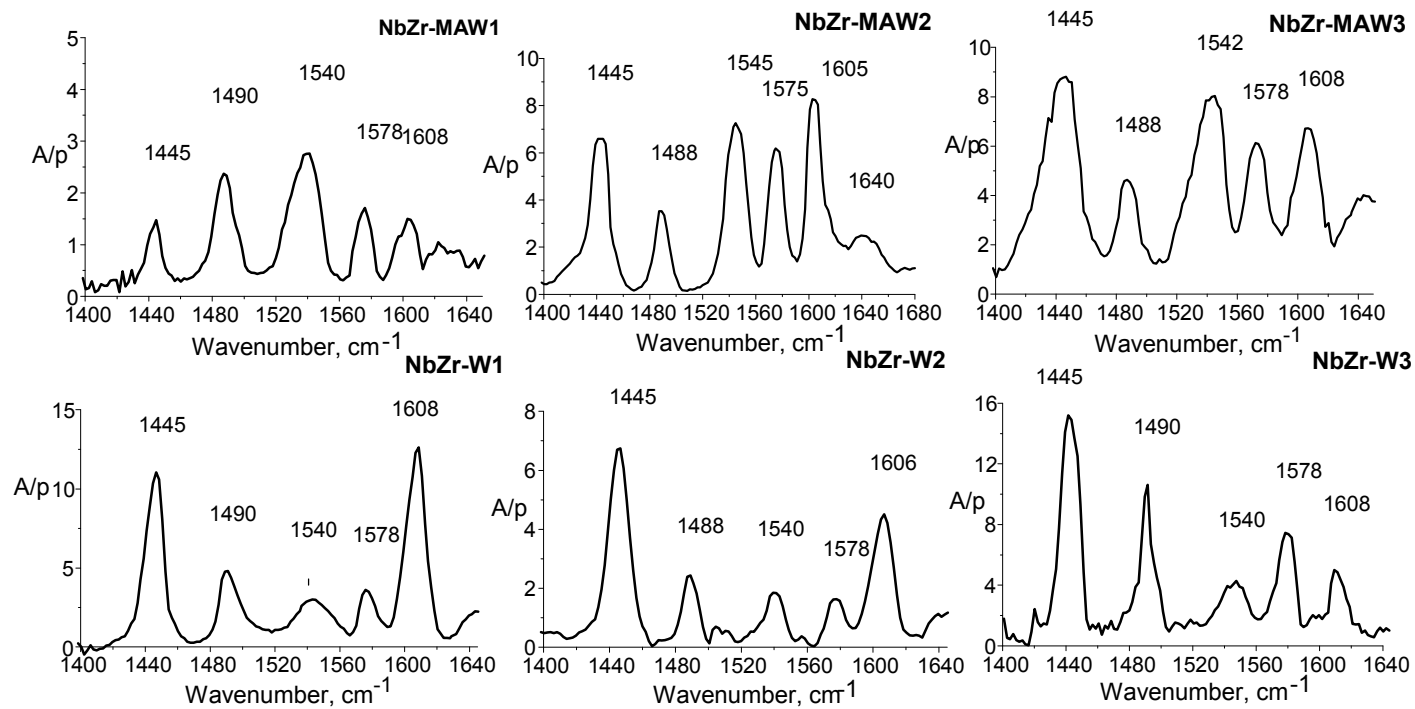

**Figure S4.** IR spectra of pyridine adsorbed on Nb,Zr-samples.

### S3. Catalytic properties of Nb, Zr-catalysts

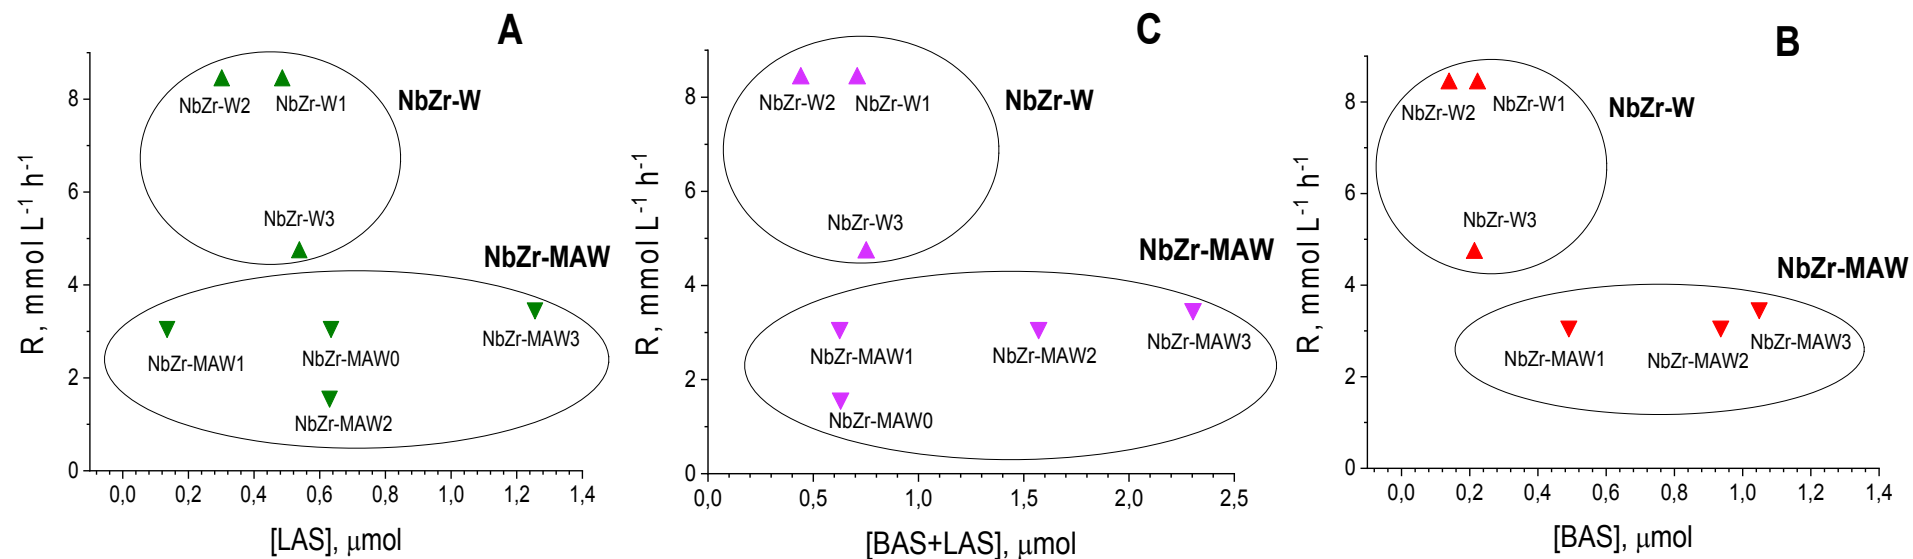

**Figure S5.** Dependence of the initial reaction rate on the amount of acid sites on the surface in the reaction of cellulose hydrolysis-dehydration. (Reaction conditions: 10 g L<sup>-1</sup> of cellulose, 45 ml of water, 1 MPa of Ar, 453 K, 7 h. Concentration of catalyst: 1 g L<sup>-1</sup> of NbZr-W and 0.5 g L<sup>-1</sup> of NbZr-MAW)

**S4. The scheme of the apparatus of hydrolysis-dehydration of cellulose under flow conditions**

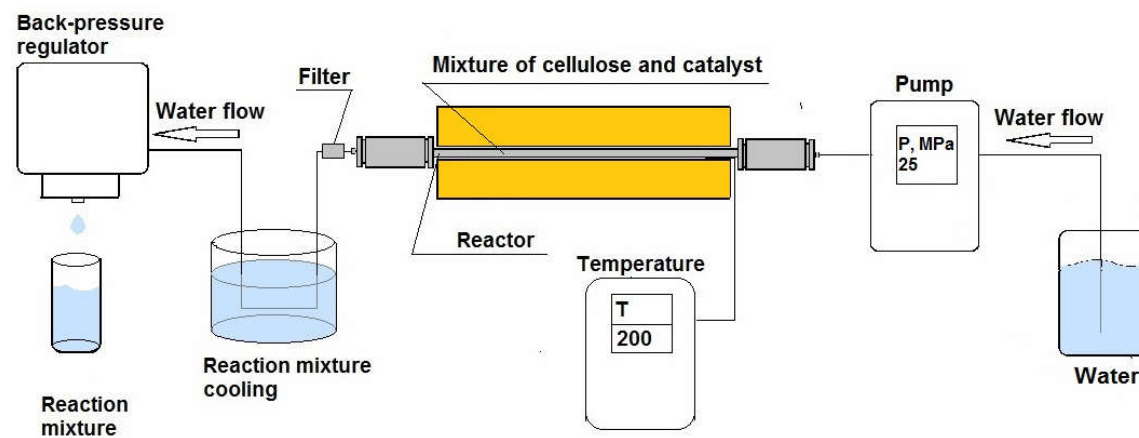

**Figure S6.** The scheme of the apparatus of hydrolysis-dehydration of cellulose under flow conditions
